# Supplementary material for: Surface Plasmon Resonance Sensor to Detect n‐Hexane in Palm Kernel Oil Using Polypyrrole Nanoparticles Reduced Graphene Oxide Layer
Source: Hindawi journal article supplement (doi:10.1155/2021/8813801), 2021-01-01
Supplement: f1 [file 8813801.f1.docx]

***Supplementary***

**Surface Plasmon Resonance Sensor to Detect n-Hexane in Palm Kernel Oil Using Polypyrrole Nanoparticles Reduced Graphene Oxide Layer**

**Amir Reza Sadrolhosseini1,*,** **Mina Habibiasr2, Hassan Soleimani3, Mohd Nizar Hamidon1,*, Yap Wing Fen1,4 and H. N. Lim5,**

1Functional Device Laboratory, Institute of Advanced Technology, Universiti Putra Malaysia, 43400UPM, Serdang, Selangor, Malaysia

2Department of Process and Food Engineering, Faculty of Engineering,Universiti Putra Malaysia. 43400UPM, Serdang, Selangor, Malaysia

3Department of Fundamental and Applied Science, Universiti Teknologi PETRONAS, 3175 Seri Iskandar, Malaysia

4Department of Physics, Faculty of Science, University Putra Malaysia, 43400UPM Serdang, Selangor, Malaysia

5Department of Chemistry, Faculty of Science, University Putra Malaysia, 43400UPM Serdang, Selangor, Malaysia

*****Correspondence: [amir17984818@gmail.com](mailto:amir17984818@gmail.com), Phone Number:+60133190104, [mnh@upm.edu.my](mailto:mnh@upm.edu.my), Phone Number:+60196648600

The SPR signal of PPy-NPs/RGO nanocomposite layer was registered in the presence of n- iso- octane at temperature of 20C, 25C, 31C, and 37C. Figure 1S shows the SPR signals in the 25C, 31C, and 37C. The resonance angle for 20C, 25C, 31C, and 37C are 59.676, 59.676, 59.676, and 59.677, respectively. The minimum resonance angle shift for detection of 1 ppm n-hexane are about 0.028°. consequently, the SPR signal for detection of n hexane in the room temperature is constant and the temperature don’t effect on the accuracy of sensor.


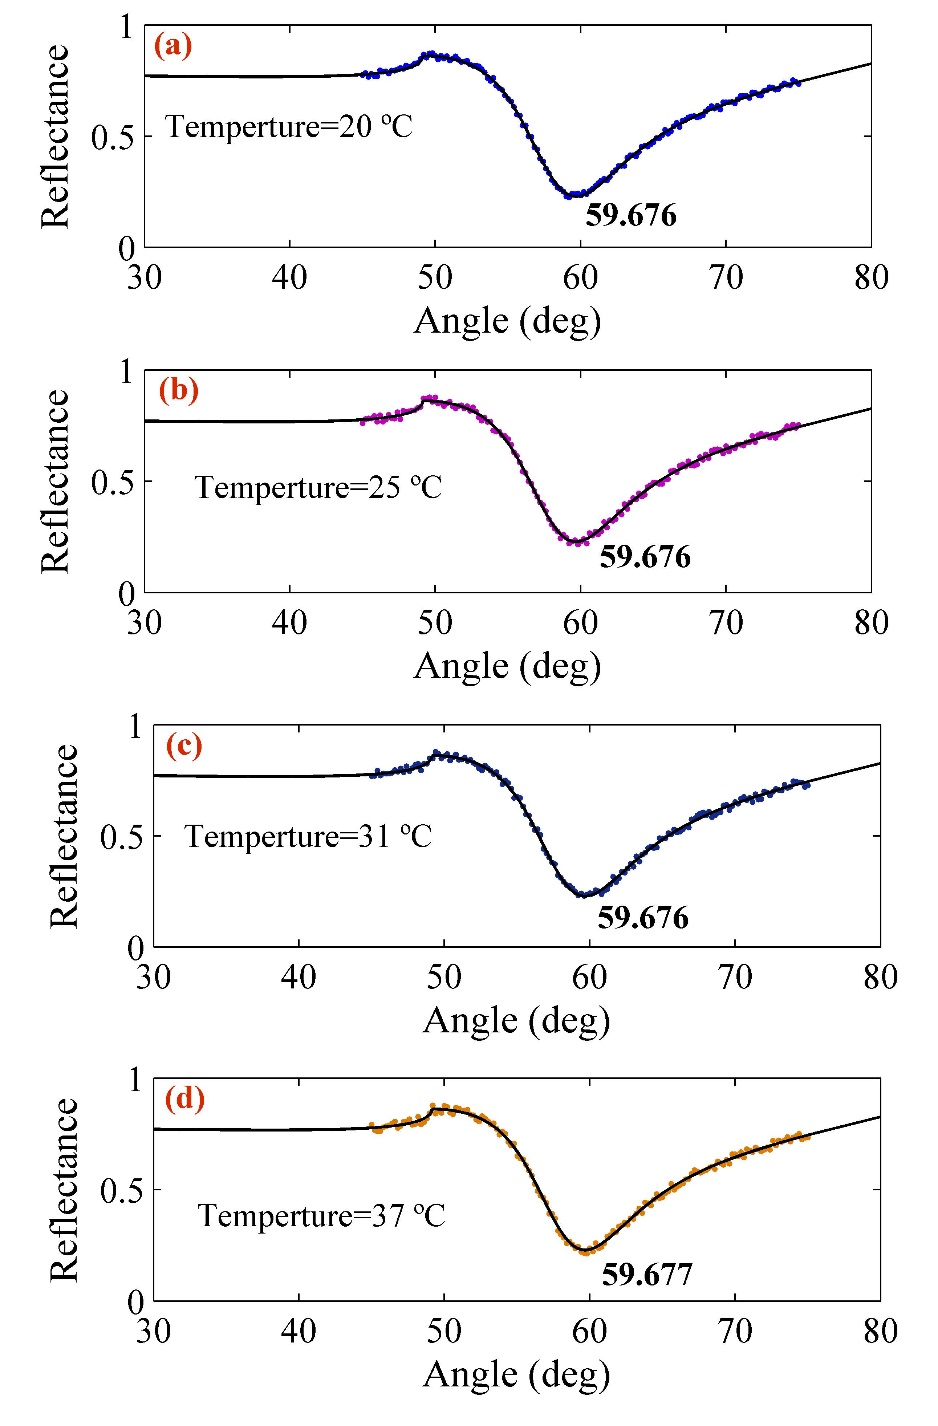


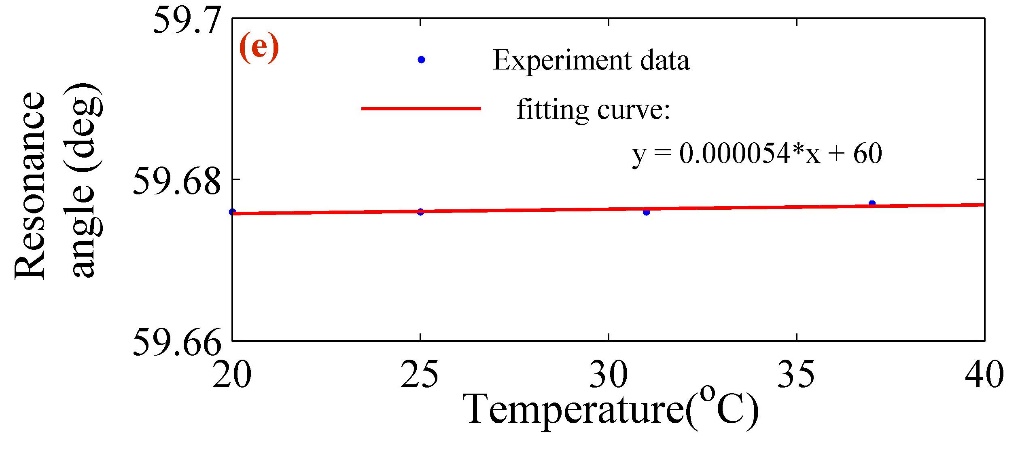


Figure 1S. The SPR signals for PPy-NPs/RGO at temperature of a) 20C, b) 35C, c) 31C, d) 37C, and e) variation of resonance angle with temperature.

The PPy-NPs/RGO as a sensing layer was contacted with pure palm oil. Figure 2S show the variation of resonance angle shift with time. As a result, the resonance angle shift is constant with time and it authenticates the PPy-NPs/RGO sensing layer is not sensitive to detect the chemical component of palm oil. Consequently, the PPy-NPs/RGO sensing layer can not interact with the chemical components of palm oil.


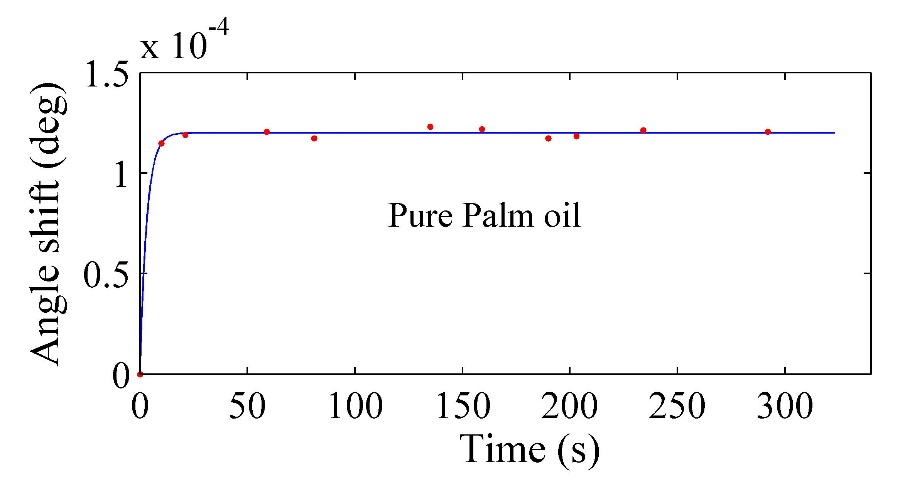


Figure 2S. Variation of resonance angle shift for pure palm oil.
